# Supplementary material
Source: PubMed Central journal article supplement (PMC10353693)
Supplement: i1537-2073-25-4-140_s01.pdf [file i1537-2073-25-4-140_s01.pdf]

**Figure S1.** Age Group by Percentage of Pharmacologic Agents Not Including DMTs

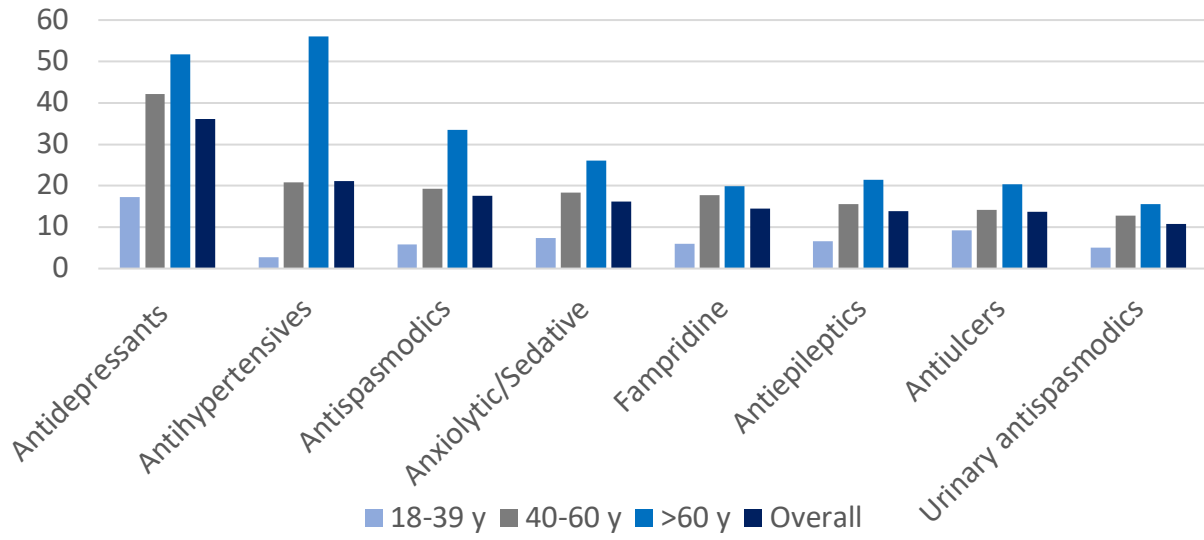

Note: Most frequent is defined as greater than 10% usage.

DMT, disease-modifying therapies.
